# Supplementary material for: Identification of PLOD3 and LRRN3 as potential biomarkers for Parkinson’s disease based on integrative analysis
Source: PubMed Central journal article supplement (PMC10232497; doi:10.1038/s41531-023-00527-8), 2023-05-31
Supplement: 41531_2023_527_MOESM1_ESM.pdf [file 41531_2023_527_MOESM1_ESM.pdf]

## Supplementary Table and Figures

| Platform | GEO accession | Sample size |     | Contributors     | Date | Identifier/<br>URL                                                                                                                      |
|----------|---------------|-------------|-----|------------------|------|-----------------------------------------------------------------------------------------------------------------------------------------|
|          |               | Control     | PD  |                  |      |                                                                                                                                         |
| GPL570   | GSE99039      | 233         | 205 | Amar et al.      | 2017 | <a href="https://www.ncbi.nlm.nih.gov/geo/query/acc.cgi?acc=GSE99039">https://www.ncbi.nlm.nih.gov/geo/query/acc.cgi?acc=GSE99039</a>   |
| GPL570   | GSE7621       | 9           | 16  | Ffrench et al.   | 2007 | <a href="https://www.ncbi.nlm.nih.gov/geo/query/acc.cgi?acc=GSE7621">https://www.ncbi.nlm.nih.gov/geo/query/acc.cgi?acc=GSE7621</a>     |
| GPL570   | GSE20141      | 8           | 10  | Middleton et al. | 2010 | <a href="https://www.ncbi.nlm.nih.gov/geo/query/acc.cgi?acc=GSE20141">https://www.ncbi.nlm.nih.gov/geo/query/acc.cgi?acc=GSE20141</a>   |
| GPL96    | GSE20163      | 9           | 8   | Miller et al.    | 2010 | <a href="https://www.ncbi.nlm.nih.gov/geo/query/acc.cgi?acc=GSE20163">https://www.ncbi.nlm.nih.gov/geo/query/acc.cgi?acc=GSE20163</a>   |
| GPL96    | GSE20164      | 5           | 6   | Hauser et al.    | 2010 | <a href="https://www.ncbi.nlm.nih.gov/geo/query/acc.cgi?acc=GSE20164">https://www.ncbi.nlm.nih.gov/geo/query/acc.cgi?acc=GSE20164</a>   |
| GPL96    | GSE20292      | 18          | 11  | Middleton et al. | 2010 | <a href="https://www.ncbi.nlm.nih.gov/geo/query/acc.cgi?acc=GSE20292">https://www.ncbi.nlm.nih.gov/geo/query/acc.cgi?acc=GSE20292</a>   |
| GPL1352  | GSE24378      | 9           | 8   | Cantuti et al.   | 2010 | <a href="https://www.ncbi.nlm.nih.gov/geo/query/acc.cgi?acc=GSE24378">https://www.ncbi.nlm.nih.gov/geo/query/acc.cgi?acc=GSE24378</a>   |
| GPL570   | GSE49036      | 8           | 20  | Dijkstra et al.  | 2015 | <a href="https://www.ncbi.nlm.nih.gov/geo/query/acc.cgi?acc=GSE49036">https://www.ncbi.nlm.nih.gov/geo/query/acc.cgi?acc=GSE49036</a>   |
| GPL24676 | GSE184950     | 10          | 24  | Wang et al.      | 2022 | <a href="https://www.ncbi.nlm.nih.gov/geo/query/acc.cgi?acc=GSE184950">https://www.ncbi.nlm.nih.gov/geo/query/acc.cgi?acc=GSE184950</a> |

**Supplementary Table 1. Description of the included GEO cohorts**

**a**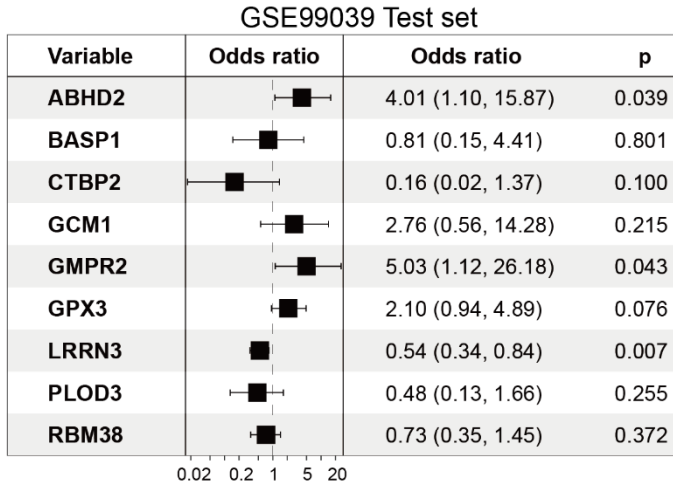**b**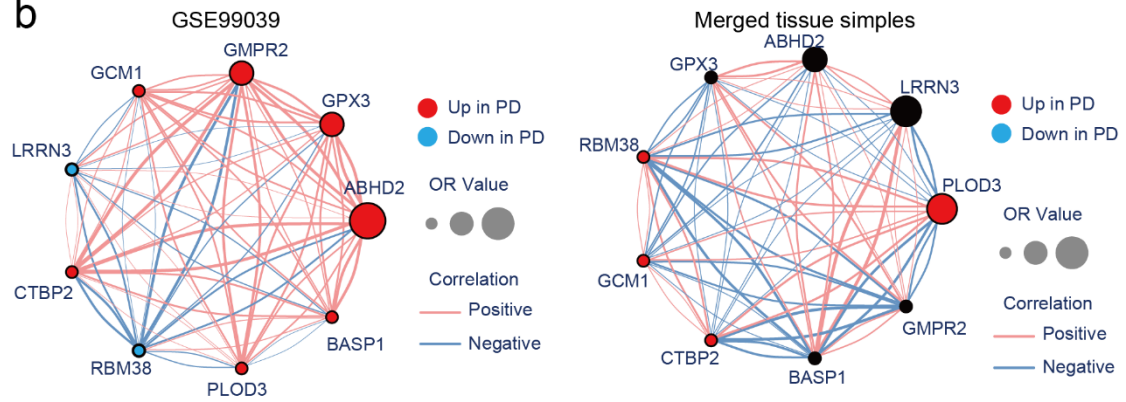

**Supplementary Figure 1. a** Multivariate logistic regression model analysis, which included the nine genes in the test set of GSE99039. The forest plot displays the odds ratio (OR) values and their 95% confidence intervals from various genes. Each square represents a gene, with the position of the square indicating the OR value and the horizontal line representing the 95% confidence interval. **b** Network plot visualized the correlation between nine genes from GSE99039 and merged GEO datasets, respectively.

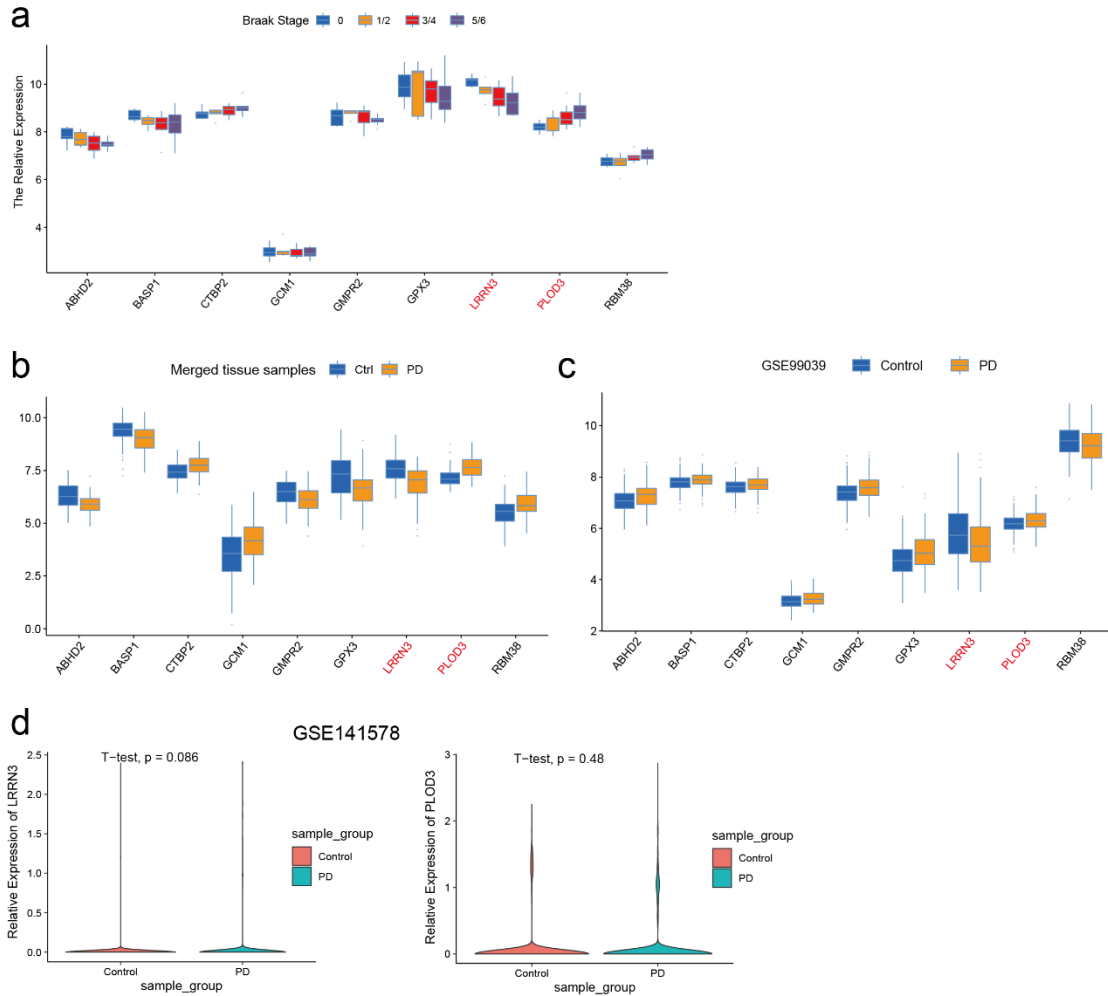

**Supplementary Figure 2.** **a** The expression difference of nine genes from different Braak stages samples. **b, c** The expression difference of nine genes between control and PD groups of merged GEO datasets (**b**) and GSE99039 (**c**), respectively. **d** The expression difference of LRRN3 and PLOD3 in the CSF between control and PD patient groups. Boxplots summarize the distribution of the data. The box represents the interquartile range, with the horizontal line inside the box indicating the median. The whiskers extend to the minimum and maximum values within 90% of the data range.

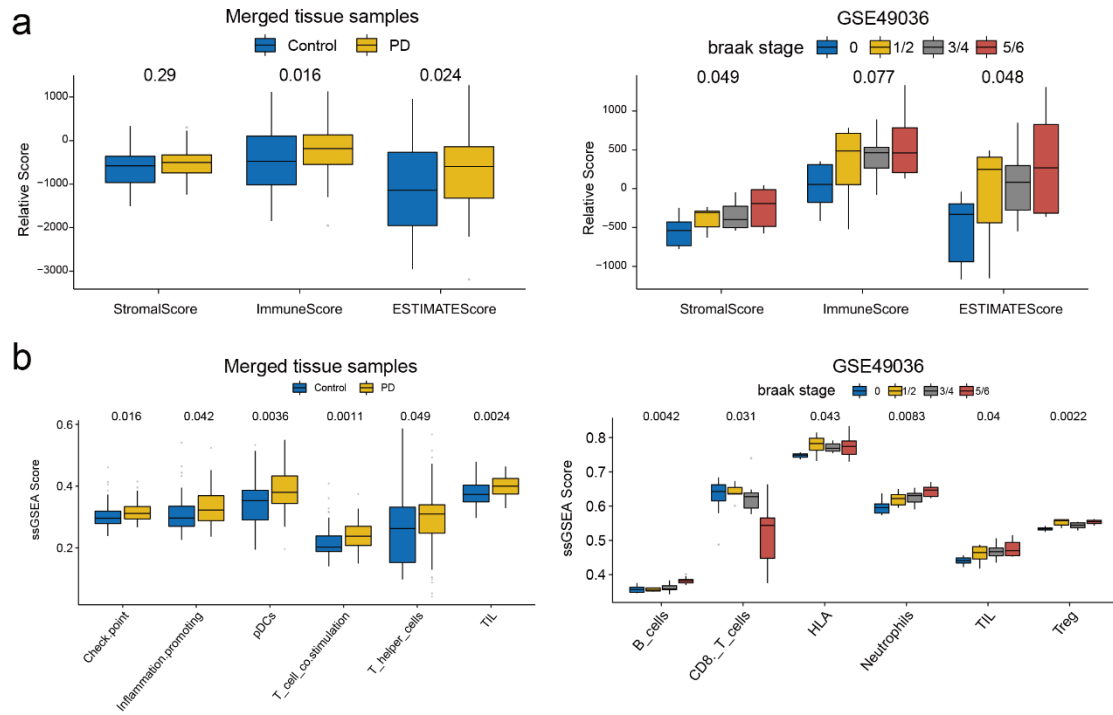

**Supplementary Figure 3. a** The difference of stromal score, immune score and ESTIMATE score between indicated groups. **b** The difference of immune infiltration between indicated groups of merged GEO datasets and GSE49036, respectively. The box represents the interquartile range, with the horizontal line inside the box indicating the median. The whiskers extend to the minimum and maximum values within 90% of the data range.

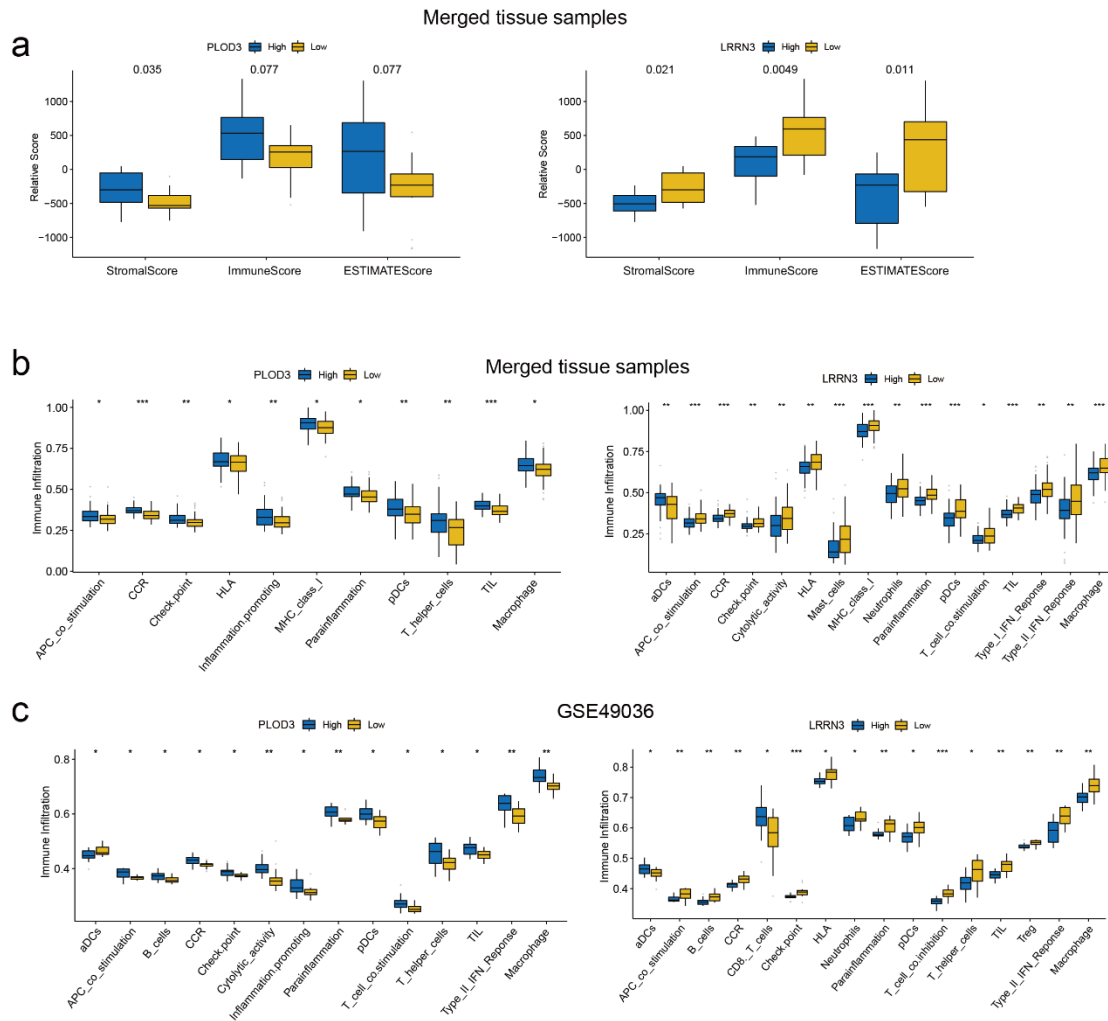

**Supplementary Figure 4.** **a** The difference of stromal score, immune score and ESTIMATE score between high and low PLOD3 (left panel) or LRRN3 (right panel) groups. **b, c** The difference of immune infiltration between high and low PLOD3 or LRRN3 groups of merged GEO datasets (**b**) and GSE49039 (**c**), respectively. The box represents the interquartile range, with the horizontal line inside the box indicating the median. The whiskers extend to the minimum and maximum values within 90% of the data range. P-value < 0.05 were accepted as statistically significant (\*p-value < 0.05; \*\*p-value < 0.01; \*\*\*p-value < 0.001).
